# Supplementary figures and images for: Evaluation of Hypoxia-Inducible Factor-1 Alpha (HIF-1α) in Equine Sarcoid: An Immunohistochemical and Biochemical Study
Source: MDPI journal article supplement (doi:10.3390/pathogens9010058), 2020-01-14

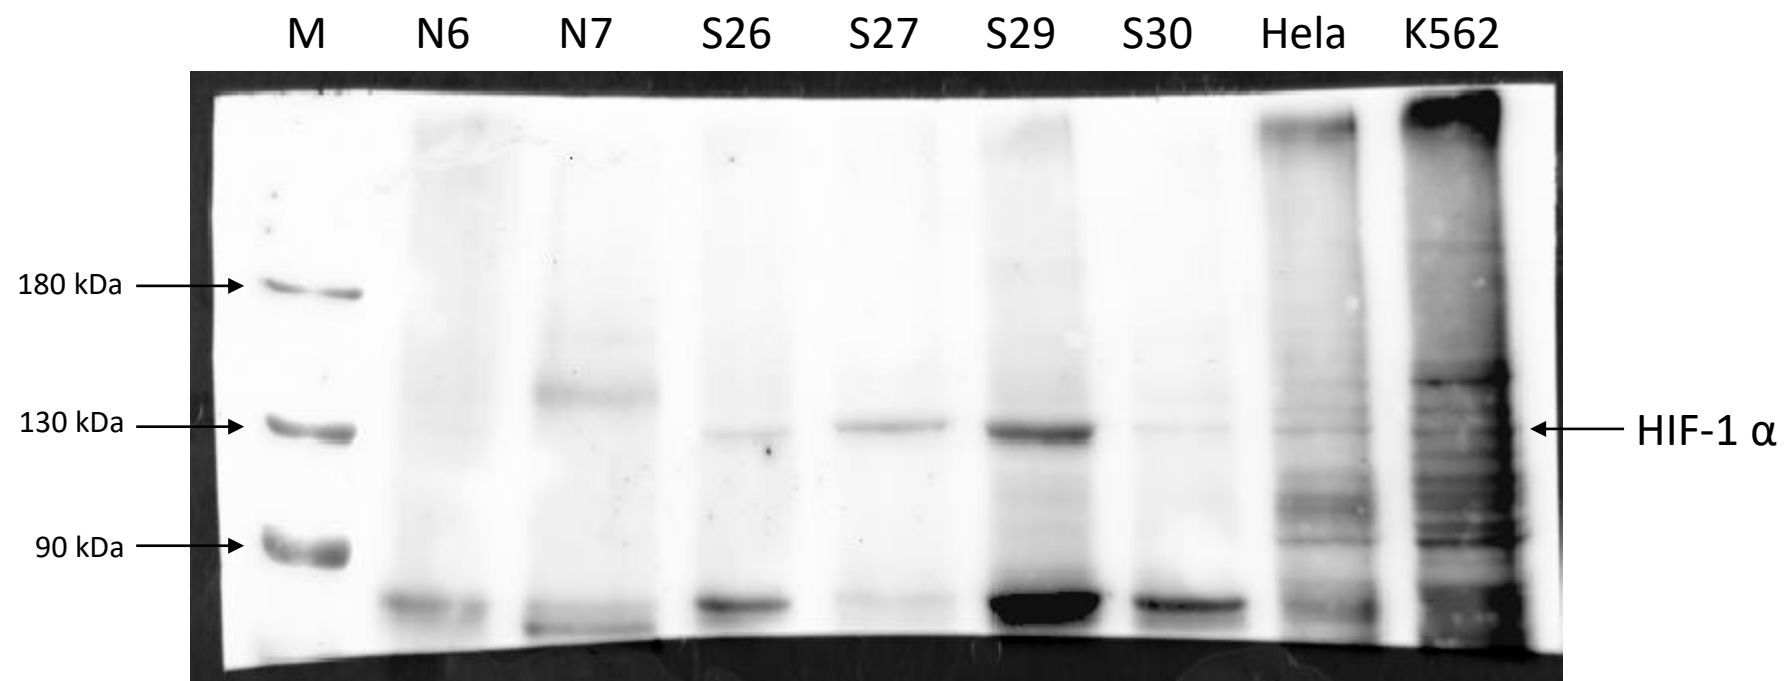

Supplement: s1 [file s1]
